# Supplementary material for: RAD51AP1 Loss Attenuates Colorectal Cancer Stem Cell Renewal and Sensitizes to Chemotherapy
Source: Oxford University Press journal article supplement (doi:10.1158/1541-7786.mcr-20-0780), 2021-06-07
Supplement: 15417786mcr200780-sup-250967_3_supp_7123465_qt9jwj.doc [file 15417786mcr200780-sup-250967_3_supp_7123465_qt9jwj.doc]

**Supplementary Figures:**

**
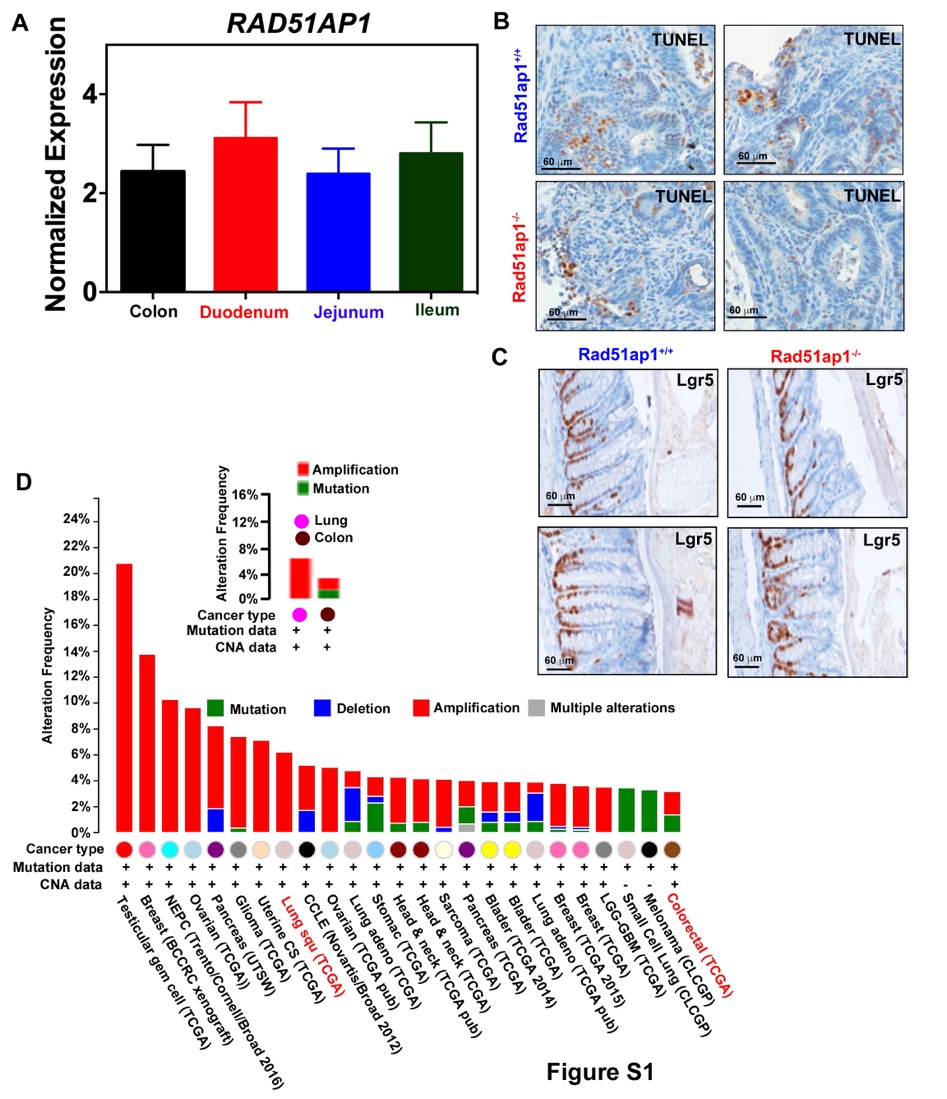
**

**Figure S1. A,** Quantitative real-time PCR (qRT-PCR) analysis shows the normalized levels of *Rad51ap1* gene transcript in colon, duodenum, jejunum, and ileum of Rad51ap1+/+ and Rad51ap1-/- mice. (n=3 mice in each genotype). **B,** Representative image of TUNEL staining in colon tissues of *Rad51ap1+/+* and *Rad51ap1-/-* mice. (n=3 mice in each genotype). **C,** Representative image of anti-Lgr-5 antibody staining in colon tissues of *Rad51ap1+/+* and *Rad51ap1-/-* mice. (n=3 mice in each genotype). **D,** CBioportal dataset from different human cancers show the percent of *RAD51AP1* amplification, deletion, mutation, and multiple alterations. (n=23, 608).

**
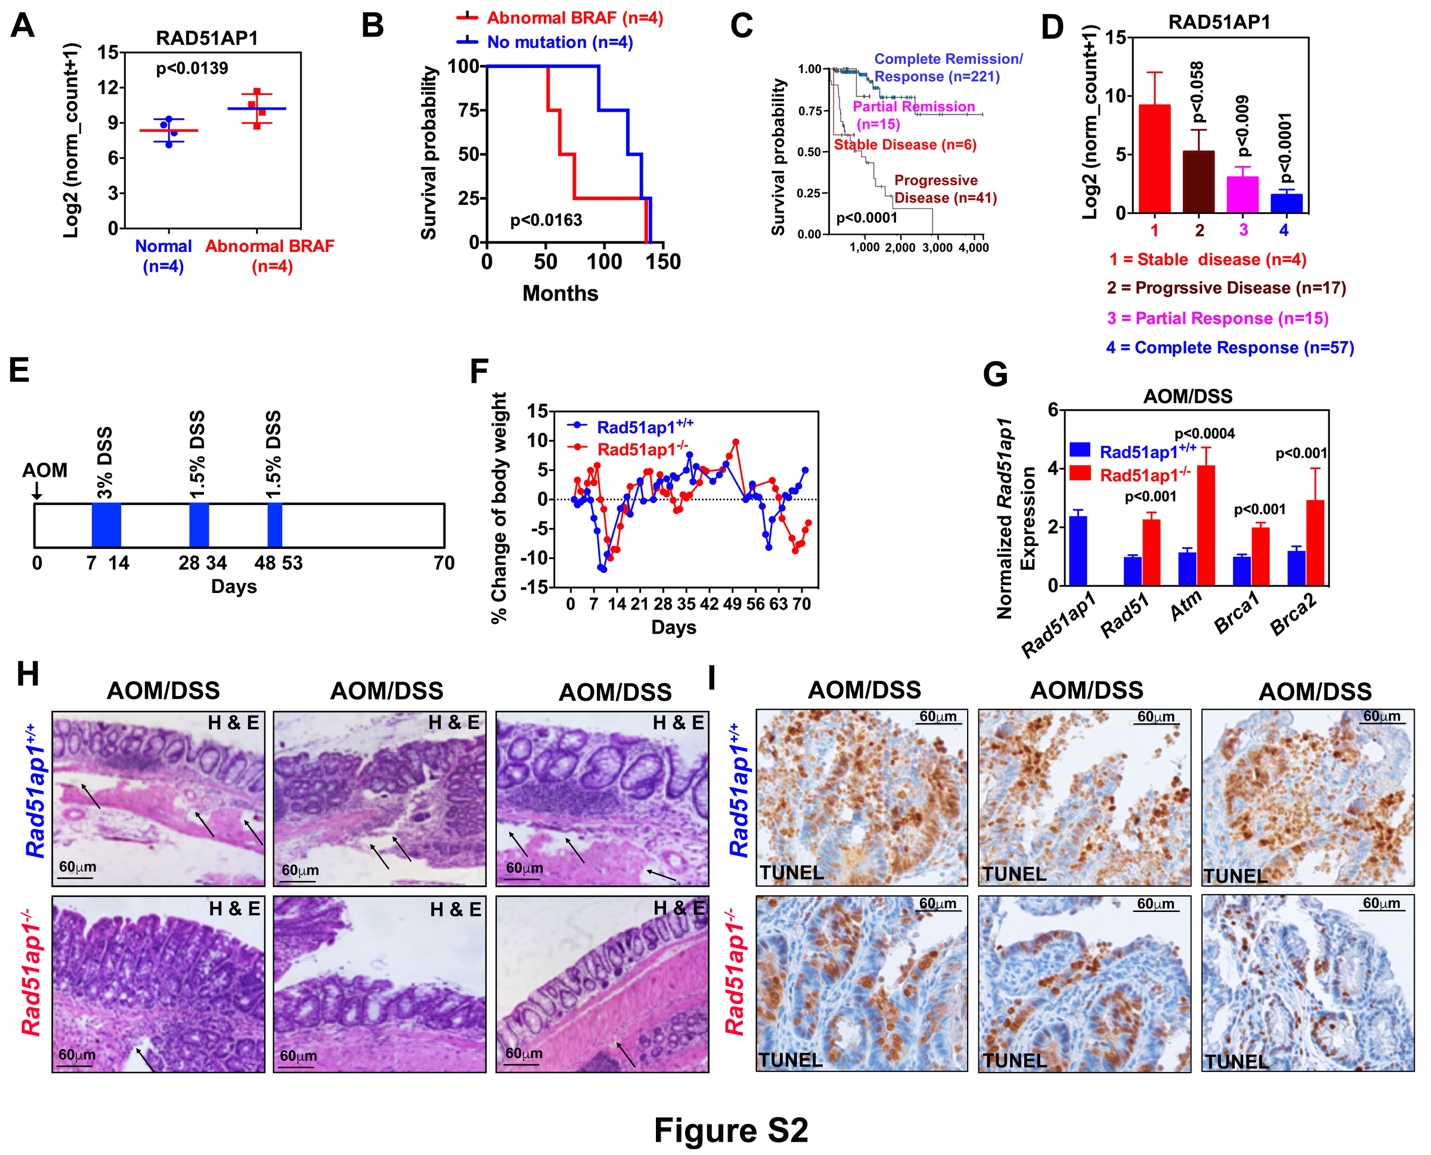
**

**Figure S2. A,** *RAD51AP1* expression was analyzed in BRAF mutant (n=4) CRC patients and compared with CRC patients without BRAF mutation (n=4). B, Overall survival probability between *RAD51AP1* expression and BRAF mutation was stratified from the TCGA database (n=4 with BRAF mutation and n=4 without BRAF mutation). **C & D,** Overall survival probability between *RAD51AP1* expression and treatment response was stratified from the TCGA database (n=57 complete response; n = 15 partial response; n = 17 progressive disease; and n=4 stable disease). **E,** Schematic diagram of AOM/DSS induced colon cancer. **F,** Percent change in body weight over time (in days) of *Rad51ap1+/+* and *Rad51ap1-/-* mice. **G,** Normalized expression of DNA damage repair genes in the colonic tissues of *Rad51ap1+/+* and *Rad51ap1-/-*mice. (n=3-5 mice in each genotype). **H,** Representative image of H&E staining reveal that *Rad51ap1* deficiency significantly protects the normal epithelial architecture by reducing the inflammation and infiltrating leukocytes in AOM/DSS-induced carcinogenesis when compared to *Rad51ap1+/+* mice (n=3-5 mice in each). **I,** Representative images of TUNEL staining in *Rad51ap1+/+*-AOM/DSS and *Rad51ap1-/-*-AOM/DSS mice show that increased apoptosis in *Rad51ap1+/+*-AOM/DSS mice (n=3-5 mice in each).


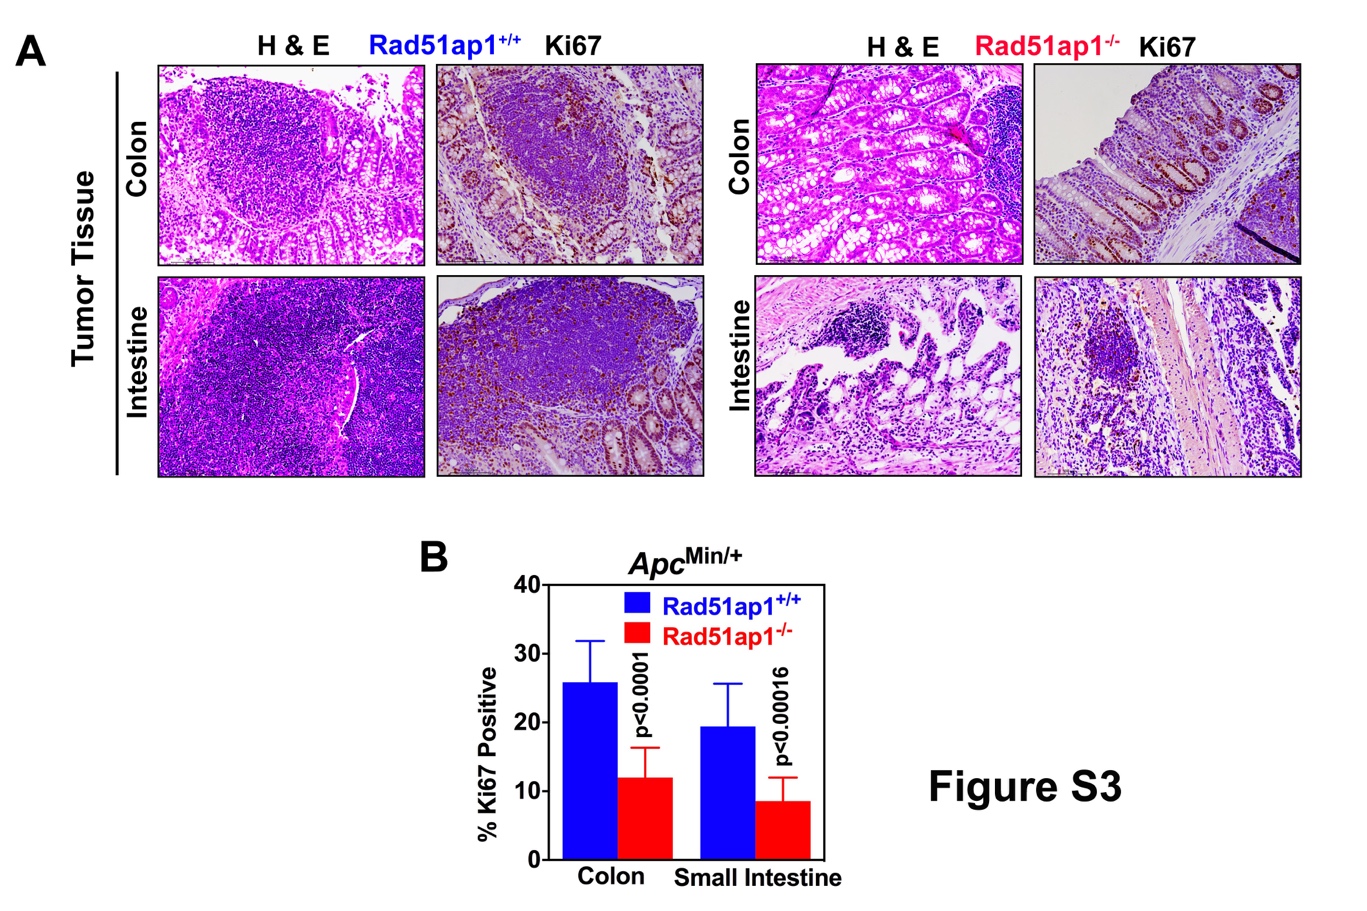
**Figure S3.** **A & B,** Morphometric analysis (H&E) and Ki67 staining reveal that Rad51ap1 deficiency significantly protects mice from the *Apc*Min/+ induced colon cancer (n=3-5 mice in each).
